# Supplementary material for: Prevention of murine autoimmune diabetes by CCL22-mediated Treg recruitment to the pancreatic islets
Source: JCI journal article supplement (doi:10.1172/jci43048), 2011-07-01
Supplement: sd1 [file 1]

## Supplementary Figure 1

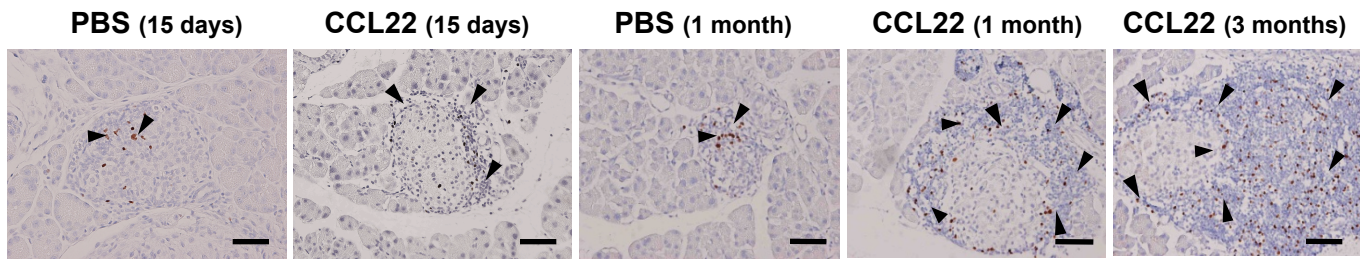

### Supplementary Figure 1. Detection of Foxp3<sup>+</sup> cells in pancreas.

Immunostaining of pancreas sections showing Foxp3<sup>+</sup> cells surrounding the islet (arrows).  
Scale bar=100  $\mu$ m for all images.

## Supplementary Figure 2

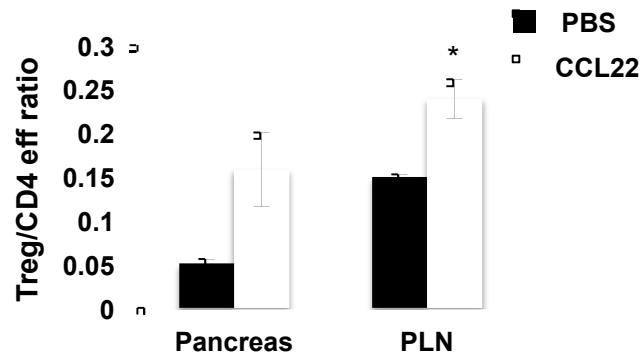

### Supplementary Figure 2. Treg/CD4 effector ratios are increased in CCL22-NOD mice.

The ratio of Tregs (CD4<sup>+</sup>Foxp3<sup>+</sup>) to CD4eff (CD4<sup>+</sup> FoxP3<sup>-</sup>) was determined in the pancreas and PLN at one month after injection by flow cytometry for PBS control (N=4) and CCL22-NOD (N=5). CCL22-NOD vs PBS-NOD  $p=NS$  in pancreas and  $*p=0.02$  in PLN.

## Supplementary Figure 3

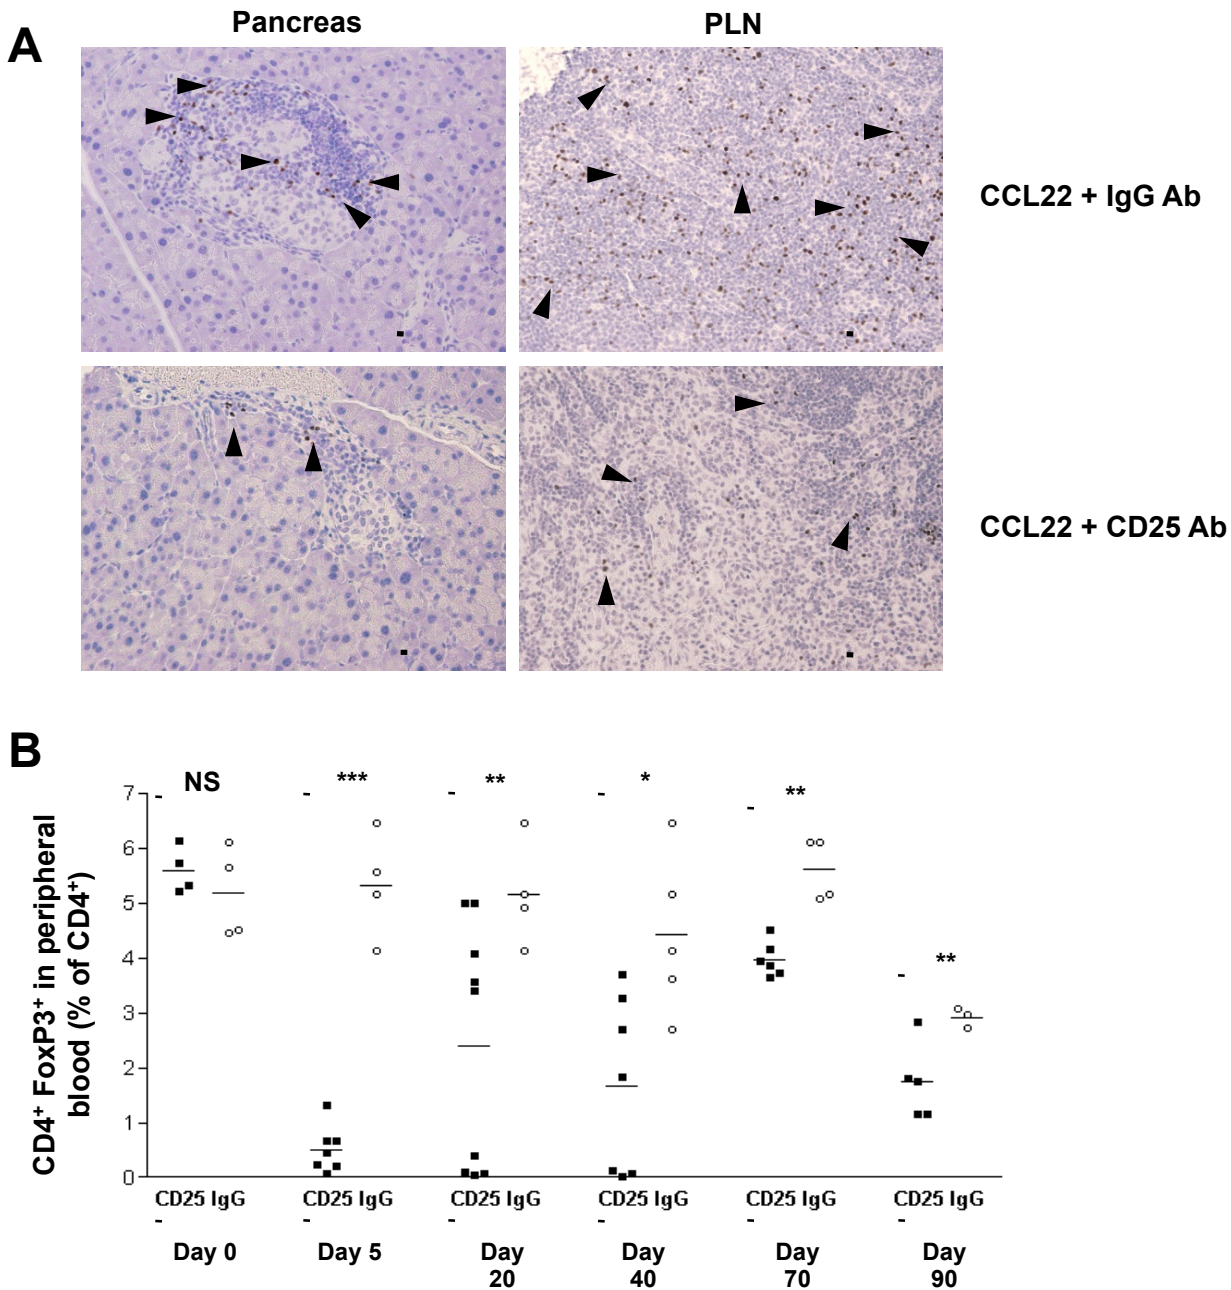

### Supplementary Figure 3. CD25 Ab depletes Tregs in CCL22-NOD mice

(A) Histological analysis of pancreas and PLN from CCL22-NOD mice treated with IgG or anti-CD25 antibody. Immunostaining showing that Fc $\gamma$ R3<sup>+</sup> cells (arrows) are decreased in tissues of mice treated with anti-CD25 antibody. A representative animal is shown. Scale bar = 100 $\mu$ m for all images.

(B) Flow cytometric analysis of CD4<sup>+</sup>FoxP3<sup>+</sup> cells in blood of CCL22-NOD mice treated with anti-CD25 (■) or isotype-matched control IgG (○). \*\*\*p<0.001, \*\*p<0.01, \*p<0.05. Line between squares indicates mean.

## Supplementary Figure 4

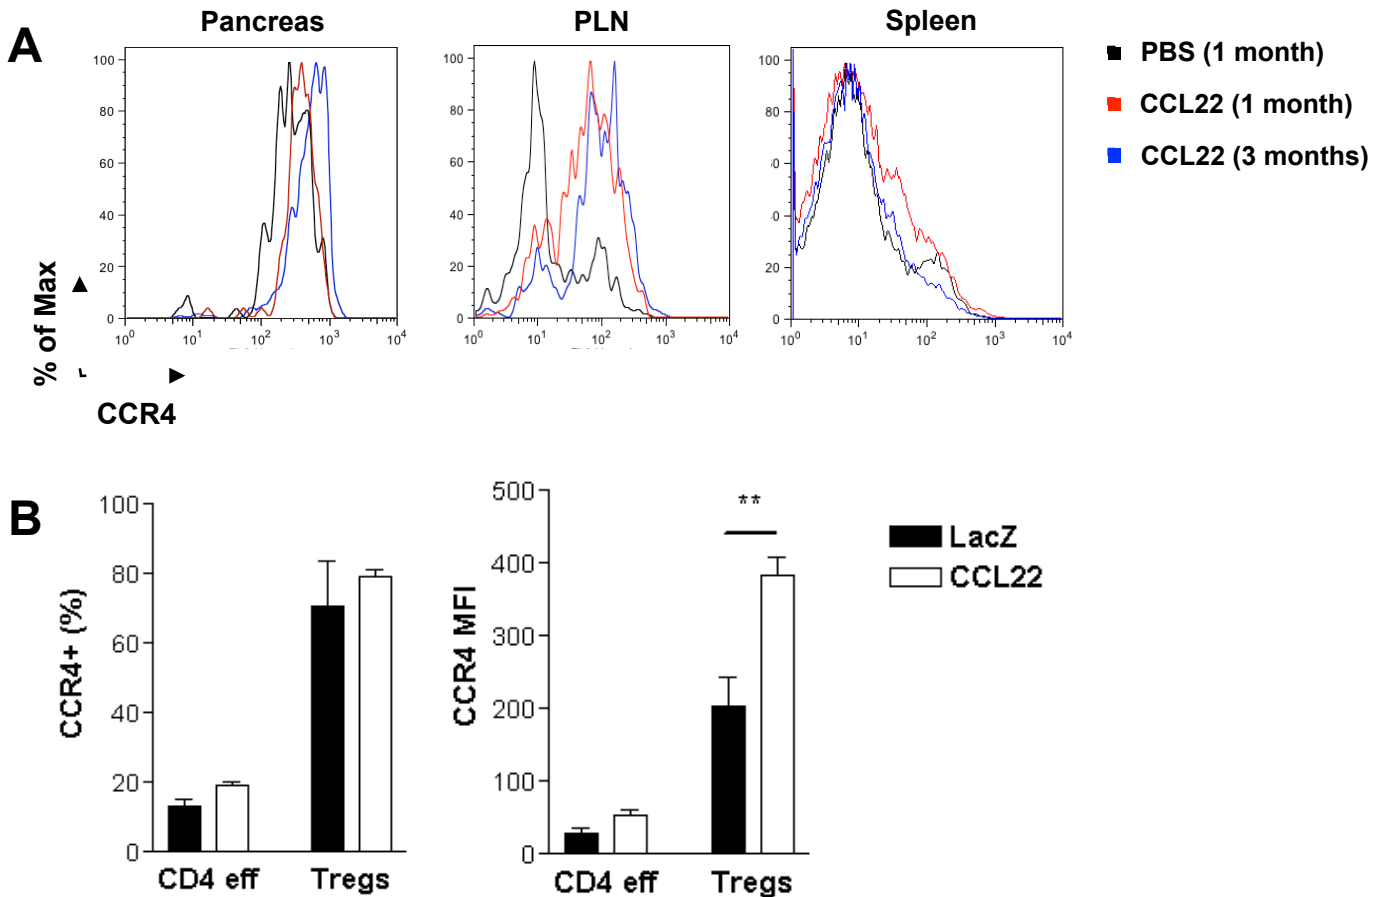

### Supplementary Figure 4. CCR4 expression is increased in CCL22-expressing mice.

**(A)** CCR4 expression on Tregs in pancreas, PLN and spleen of CCL22-NOD at 1 and 3 months after injection. Cells in the CD4<sup>+</sup>Foxp3<sup>+</sup> gate were analyzed for expression of CCR4. N=2 for each group ( $p=NS$ ). A representative animal is shown. **(B)** CCR4 expression on CD4<sup>+</sup> FoxP3<sup>-</sup> effector T cells and CD4<sup>+</sup> FoxP3<sup>+</sup> Tregs in CCL22- ( $n=4$ ) and LacZ-expressing grafts ( $n=3$ ) 10 days post-transplant, determined by flow cytometry. Left panel: CCR4<sup>+</sup> cells as percent of CD4 effector cells or Tregs.  $p=NS$ . Right panel: Tregs in CCL22 grafts express higher levels of CCR4 than in LacZ grafts. Data shown as mean fluorescence intensity (MFI) of CCR4 in indicated cell populations. \*\* $p=0.01$  vs LacZ.

## Supplementary Figure 5

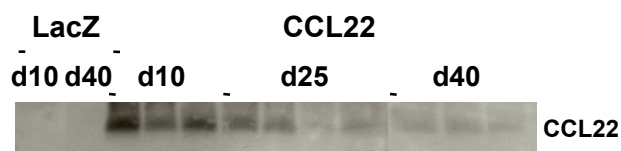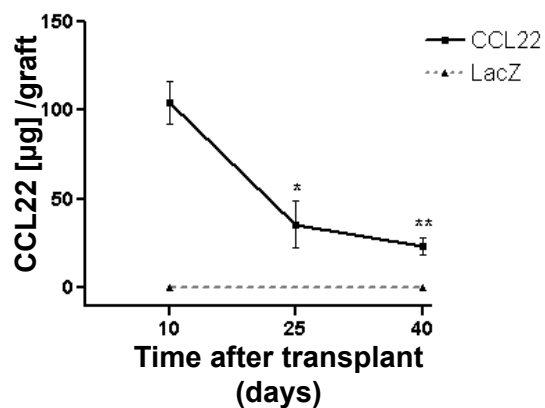

### Supplementary Figure 5. CCL22 expression decays with in syngeneic islet grafts.

CCL22 levels determined by Western blot (upper panel) and ELISA (lower panel) in Ad-CCL22 or Ad-LacZ transduced NOD.*scid* islets transplanted into STZ-diabetic NOD.*scid* recipients and harvested at indicated times post-transplantation. Results are expressed as mean  $\pm$  SEM. \* $p < 0.05$  and \*\* $p < 0.01$  vs CCL22 at day 10.

## Supplementary Figure 6

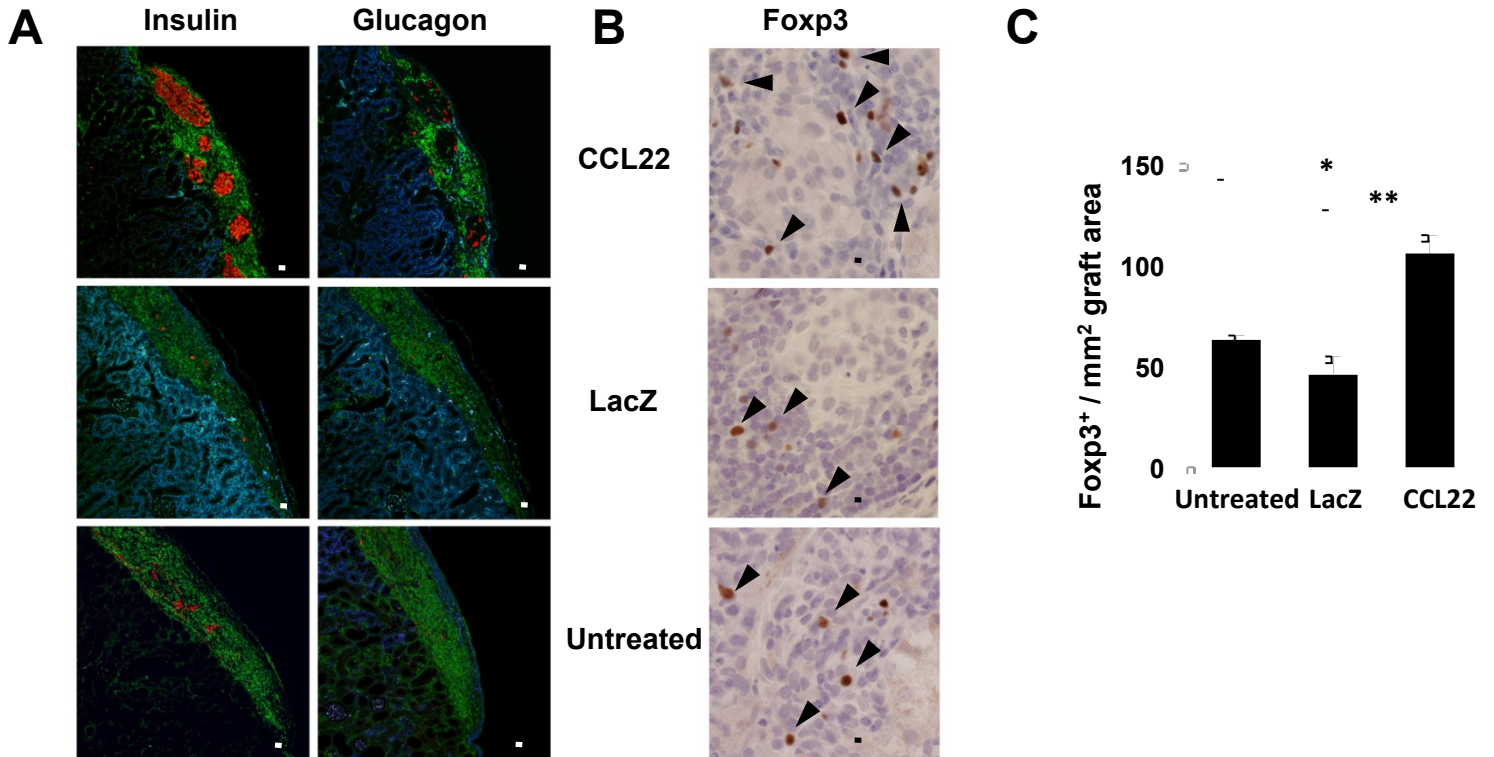

### Supplementary Figure 6. Histological analysis of islet grafts.

**(A)** Immunostaining of sections of islet grafts 10 days post-transplantation for insulin- or glucagon-positive cells (red), and CD45<sup>+</sup> cells (green). Pictures shown are representative of grafts examined from mice of each treatment group. **(B)** Sections of the same grafts immunostained for FoxP3<sup>+</sup> cells (arrows) showing presence of increased proportion of Foxp3<sup>+</sup> cells in CCL22-expressing grafts. Scale bar = 100  $\mu$ m for all images. **(C)** Treg numbers were determined as a proportion of infiltrated graft area on sections immunostained for FoxP3. One representative section from each graft was analyzed (CCL22: n=4; LacZ: n=3; control: n=2). \* $p$ <0.05 and \*\* $p$ <0.01.

## Supplementary Figure 7

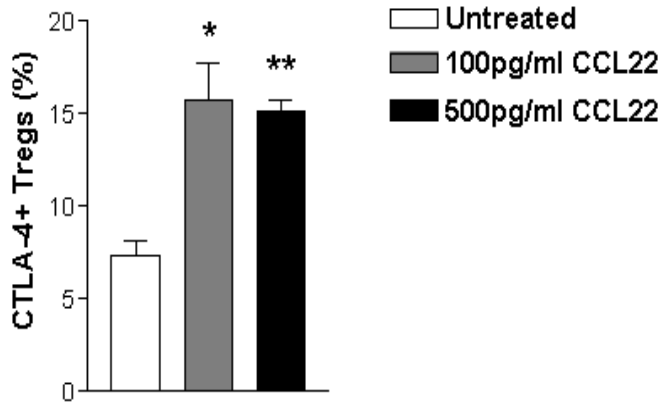

### Supplementary Figure 7. CCL22 increases CTLA-4 expression on Tregs *in vitro*.

Expression of CTLA-4 on Tregs is upregulated after 24 hours *in vitro* incubation with 100 and 500 pg/ml of recombinant mouse CCL22, as determined by flow cytometry. There was no difference in cell survival between the 3 groups during the assay. Data are representative of 3 experiments. \* $p < 0.05$  and \*\* $p < 0.01$  vs untreated.
